# Supplementary material for: Positive response to inoculation with indigenous arbuscular mycorrhizal fungi as modulated by barley genotype
Source: Springer Nature journal article supplement (doi:10.1007/s13593-025-01016-3), 2025-03-28
Supplement: MOESM1 [file 13593_2025_1016_MOESM1_ESM%20%282%29.docx]

**Supplementary materials**

**Positive response to inoculation with indigenous arbuscular mycorrhizal fungi as modulated by barley genotype**

Valentina Marrassini a, Laura Ercoli a, Ana Vanessa Aguilar Paredes a, Elisa Pellegrino a,*

a Institute of Crop Science, Scuola Superiore Sant’Anna, Piazza Martiri della Libertà 33, 56127 Pisa, Italy

***Corresponding author. E-mail address: elisa.pellegrino@santannapisa.it (E. Pellegrino)**

**Supplementary Materials and Methods**

**1. Characterization of the soil in the experimental field sites**

In 2020, the soil was a clay loam (43.7% sand, 24.8% silt, and 31.5% clay) (Staff 1993), with 12.5 g kg-1 of soil organic carbon (SOC) (medium content) (Walkley-Black, Nelson and Sommers 1982), pH (H2O) of 8.0 (moderate alkaline) (deionized water 1:2.5 w/v; McLean 1982), and the following nutrient concentrations: 0.8 g kg−1 total N (Kjeldahl) (Bremner and Mulvaney 1982), 35.0 mg kg−1 available P (Olsen and Sommers 1982), indicating low and very low nutrient status, respectively; 19.4 mg kg−1 available Fe (diethylene-triamine-penta acetic acid method, DTPA; Lindsay and Norvell 1978), indicating an optimum level; 0.4 mg kg−1 available Zn (DTPA method; Lindsay and Norvell 1978), indicating a very low level. The C/N ratio was 8.8. Furthermore, the cation exchange capacity (CEC) was equal to 21.9, indicating a medium rate and thus low fertility. In 2021, the soil was a silty clay loam (34.5% clay, 59.4% silt, and 6.1% sand) (Staff 1993) with 21.5 g Kg-1 of SOC, pH (H2O) of 8.0 (moderate alkaline) (McLean 1982), and the following nutrient concentrations: 1.6 g kg−1 N (Kjeldahl) (Bremner and Mulvaney 1982), 57.0 mg kg−1 available P (Olsen and Sommers 1982), indicating adequate and low nutrient status, respectively; 13.5 mg kg−1 available Fe (diethylene-triamine-penta acetic acid method, DTPA; Lindsay and Norvell 1978), indicating a low level; 1.5 mg kg−1 available Zn, indicating an adequate level. The C/N ratio was 7.9. Furthermore, CEC was equal to 20.7, indicating low fertility.

**2. PCR, purification and quantification protocols**

PCRs were generated from 10 ng μl-1 genomic DNA in volumes of 25 μl with 0.125 U μl-1 of GoTaq® Hot Start Polymerase (Promega Corporation, WA, USA), 0.5 μM of each set of primers for AMF, 0.2 mM of each dNTP, 1 mM of MgCl2 and 1x reaction buffer, using a S1000 Thermal CyclerTM (BioRad, Hercules, CA, USA). For both steps, the PCR cycle consisted of an initial denaturation at 95 °C for 2 min followed by 25 cycles of 94 °C for 30 s, 59 °C for 45 s, 72 °C for 1 min for 30 s, and 72 °C for 10 min. The quality of all PCR products was examined by electrophoresis of a 2% agarose gel in 1 × TBE buffer, then the PCR products were purified with magnetic beads (Agencourt AMPure® XP, Beckman Coulter, USA) and freshly prepared 80% ethanol. Before sequencing, the concentration of PCR products was quantified by fluorescence using the Quant-iTTM dsDNA High-Sensitivity Assay Kit (Invitrogen by Thermo Fisher Scientific, CA, United States).

**3. Bioinformatics**

The 85% of reads were successfully merged (36,396 reads out of 42,716 total reads) and 18% (7,476 reads) were aligned with zero differences. The primer sequences were trimmed from the sequences using the cutadapt plugin 1.18 with Python 3.5.5, and 36,347 valid sequences were obtained after optimization. The average read length was approximately 300 base pairs (bp) based on the maximum expected error (MaxEE). The command USEARCH ‘fastq_eestats2’ was used to check sequence quality and, based on the percentage MaxEE, the reads were truncated at the drop-off point of 280 bp using the USEARCH ‘fastq_filter’ command. Quality-filtered reads were dereplicated using the USEARCH ‘fastx_uniques’ command and operational taxonomic units (OTUs) were generated by clustering reads at a 97% similarity threshold using the USEARCH ‘cluster_otus’ command. During the process, chimeric sequences and singletons were also removed.

**4. Diversity indices**

Shannon index (*H*’) was calculated as: SUM(Pi*Log10(Pi)). Simpson index (λ) was calculated as: 1-SUM(Ni*(Ni-1)/(N*(N/1)). In the formulas Pi is the proportion of individuals belonging to the ith VTX, Ni is the number of individuals to the ith VTX, and N is the total number of individuals of all VTXs.

**5. Multivariate analysis**

The plant and AM fungal parameters observed in 2020 and 2021 were squared root transformed, standardized, and Euclidean distance matrices were calculated. Since there was a high variability in the number of reads per sample (from 395 to 1,292), sequencing depth per sample was standardized to the median number of reads across the samples in each data matrix using the same package in R (standardized datasets). Then, the relative abundance of the AMF in each sample was calculated based on the ratio between the number of sequences affiliated with each VTX and the total number of sequences obtained from the sample library. Data on AM fungal communities, recorded at GS14 and GS90 in 2021, were fourth-root transformed and the Bray-Curtis matrix of similarity was calculated. The *P*-values in permutational analysis of variance (PERMANOVA) [*P*(perm)] were calculated using the Monte-Carlo test (999 permutations) (Anderson 2005; Anderson and Braak 2003).

Before performing the RELATE analysis, the PERMANOVA was applied on data of plant and AM fungal parameters and AM fungal communities recorded at GS90 in 2021. The significant pattern of plant and AM fungal traits was plotted by principal coordinate analysis (PCO) (Gower 1966) whereas, that of the AM fungal communities by non-metric multidimensional scaling (Kruskal 1964).

**Supplementary Results and Discussion**

**1. Effectiveness of AMF on barley nutrient uptake**

A significant positive response to AM fungal inoculation in terms of K uptake in grains was observed only in Atomo (+12%) (Fig. S3h; Table S3). Overall, considering the two years, no relationship was observed between the ∆AM and mycorrhizal K response ratio (R2=0.000; *P*=0.939), and no relationship was underlighted between grain yield and K concentration (Fig. 4e). The increases of K observed in Atomo was similar to the results previously recorded on barley shoots and grain under field inoculation (Masrahi et al. 2023; Powell et al. 1980). In addition, in 2021 AM fungal inoculation, irrespective of variety, promoted K in grains (Fig. S3g; Table S3). Finally, the three varieties showed higher grain K concentration in 2021 than in 2020, regardless of inoculation (Fig. S3i; Table S3). These responses are likely related to differences in the soil CEC rather than random interannual variation. Since the availability of cations, such as K, in the soil is influenced by the CEC (Blake et al. 1999), we can hypothesize that the higher CEC, observed in 2020, led to greater K availability, which in turn resulted in no response to AM fungal inoculation (Dominguez-Nuñez 2016; Gyuricza et al. 2010). In contrast, a lower CEC of soil in 2021 may explain the observed response.

Moreover, we did not observe any effect on Mg concentration in grain due to AM fungal inoculation, except for the promotion in 2020 with Atomo and Atlante (+39% and +17%, respectively) (Fig. S3d; Table S3). Grain Mg concentration was significantly and positively related to yield (Fig. 4e). Therefore, we can support an indirect effect of AMF. By contrast, no significant relationships were found between the ∆AM and mycorrhizal Mg response ratio (2020: R2=0.432, *P*=0.054; 2021: R2=0.091, *P*=0.430). Taking into consideration that K/Mg ratio is important for the nutritional status of plants (Xie et al. 2021), the fact that Mg and K were promoted in Atomo, could be an indicator of efficient physiological processes.

Inoculation with AMF increased the concentration of Zn in grains of Atlante and Atomo, irrespective of the year of cultivation (+10% and +9%, respectively), while in Concerto no effect was observed (Fig. S3). This response was not mediated by the increase of grain yield (Fig. 4e). Our results confirmed the general pattern of Zn response of crops, including wheat, corn and rice, to AMF (Lehmann et al. 2014; Pellegrino et al. 2015), although no relationship was observed between the ∆AM and mycorrhizal Zn response ratio (R2=0.035; *P*=0.457). Nevertheless, our data did not confirm that the response is modulated by the availability of Zn in soil since it did not vary between years of cultivation.

A positive effect of *R. irregularis* was reported on shoot and grain Zn concentrations of barley when soil was fertilized with Zn (Al Mutairi et al. 2020; Cardini et al. 2021; Watts-Williams and Cavagnaro 2018). However, following our results, the AMF-mediated effect depended on barley genotypes (Al Mutairi et al. 2020). We also observed a significant interaction between barley genotype and year of cultivation (Table S3). Overall grain Zn concentration was higher in 2021 when soil had an adequate level of Zn availability than in 2020 when soil had very low Zn availability (Fig. S3c). However, the relative increase of Zn uptake into grain varied among barley varieties, and Concerto that in general uptakes less Zn in grain showed a relatively lower increase (2021 vs 2020) respect to the other genotypes (Fig. S3b). Our data are in agreement with the results of a large study on the variability of grain Zn concentration in many wheat cultivars (Fan et al. 2008).

The variety Concerto showed a consistent increase of Fe in grain in 2020 when soil had an optimum level of Fe and in 2021 when soil had a low Fe availability (+24% and +130%, respectively) (Fig. S3a; Table S3). Moreover, Atomo showed an increase in grain Fe concentration following inoculation (+140%) in 2020, and no changes in 2021, similar to the responses in root colonization and yield. Finally, no changes in grain Fe uptake were recorded in Atlante following inoculation, according to root colonization in both years (Fig. S3a). Our results are in line with the positive effect of AMF reported on grasses and some genotypes of wheat (Lehmann and Rillig 2015; Pellegrino et al. 2020). Moreover, they were supported by the significant and positive relationship between the ∆AM and the Fe mycorrhizal response ratio found in both years (R2=0.449, *P*=0.048; R2=0.590, *P*=0.016), and not by a dilution effect (Fig. 4e).

Arbuscular mycorrhizal fungal inoculation did not determine any changes in Mn uptake in barley grain or determined significant decreases (i.e., in 2020: -19% and -34% in Atomo and Concerto, respectively) (Fig. S3j). This is supported by the significant and negative relationship between the ∆AM and the mycorrhizal Mn response ratio (R2=0.464; *P*=0.043), and with the overall decrease (-4%) under inoculation (Lehmann and Rillig 2015). Explanations could be the fact that AMF increases soil pH and the availability of Mn in soil with subsequent leaching, and the reduction of Mn-reducing microbes, or the promotion of Mn-oxidizing microbes (Kothari et al. 1991).

The concentration of Cu in grain was not affected by AMF in Atomo and Concerto (Fig. S3k; Table S3), supported by a non-significant relationship between ∆AM and the mycorrhizal Cu response ratio (R2=0.292; *P*=0.133). In contrast, Atlante showed a significant increase in Cu concentration (+8%) independent of the year of cultivation (Fig. S3k). This aligns with the positive AM-fungal mediated effect on crop Cu uptake (+29%) reported by Lehmann and Rillig (2015). Additionally, barley varieties responded differently in 2020 and 2021, regardless of inoculation (Fig. S3l; Table S3), likely due to soil texture effects on Cu availability (Alloway 1995). In clay-rich soils, such as in 2021, Cu is more immobilized, making the genotype effect more evident.

Increases in Ca uptake in grain were observed, irrespective of year of cultivation, in Atlante and Concerto (+21% and 95%) (Fig. S3e). A direct effect of AMF could be hypothesized since the uptake was not determined by yield increases (Fig. 4e). However, we can not directly link the AM colonization in roots with Ca uptake, since no significant relationship was observed between the ∆AM and the mycorrhizal Ca response ratio (R2=0.028; *P*=0.508). Calcium changes under AM fungal inoculation have been scarcely investigated, and Watts-Williams and Gilbert (2021) found no changes in barley inoculated with *R. irregularis*. Furthermore, we did not observe any changes among barley varieties in 2021, whereas in 2020 Atomo and Concerto showed a higher uptake of Ca (Fig. S3f). In 2020, soil with a higher CEC and lower Ca availability could explain the interaction.

**Supplementary Tables**

**Table S1** Characteristic of the genetic material of barley used in the study

**Table S2** Physical and chemical parameters of soil of the field sites

**Table S3** ANOVAs of the effect of year of cultivation, barley genotype, and arbuscular mycorrhizal fungal (AMF) inoculation and their interactions on AMF root abundance and plant functional parameters

**Table S4** PERMANOVAs and variation partitioning of the effect of year of cultivation, barley genotype, AMF inoculation, and their interactions on AMF root abundance and plant functional parameters

**Table S5** PERMANOVA pairwise comparisons of the effect of barley genotype and AMF inoculation on the AMF root abundance and plant functional parameters

**Table S6** Representative sequences of AM fungi found in the roots of three barley genotypes inoculated and not inoculated with a local AMF consortium

**Table S7** ANOVAs of the effect of barley genotype, AMF inoculation, growth stage and their interactions on richness, Shannon index, and Simpson index of AM fungi in roots.

**Table S8.** Means and standard errors of the effect of barley genotype, AMF inoculation, growth stage on richness, Shannon index, and Simpson index of AM fungi in roots

**Table S9** PERMANOVAs and variation partitioning of the effect of barley genotype, AMF inoculation, growth stage, and their interactions on the AMF community structure in roots

**Table S10** PERMANOVA pairwise comparisons of the effect of barley genotype and AMF inoculation on the AMF community structure in roots

**Supplementary Figures**

**Fig. S1** Graphical scheme of the study

**Fig. S2** Effect of the interactions between barley genotype and arbuscular mycorrhizal fungal (AMF) inoculation on P and N concentration in shoot at the four leaves unfolded stage (GS14)

**Fig. S3** Effect of the interaction among year of cultivation, barley genotype, and AMF inoculation on Fe, Mg, Mn, Zn, Ca, K, and Cu grain nutrient concentration at the physiological maturity (GS90)

**Fig. S4** Neighbor-Joining tree of the representative sequences of the arbuscular mycorrhizal fungi retrieved in the roots of three barley genotypes

**Fig. S5** Rarefaction curves of AM fungi at virtual taxon level found in the roots of three barley genotypes inoculated and not-inoculated at GS14 and at GS90

**Fig. S6** Venn diagrams of the AM fungal virtual taxa uniquely retrieved in the roots and shared among the three barley genotypes

**Fig. S7** Venn diagrams of the AM fungi uniquely retrieved and shared between +M and -M in each barley genotype and at each growth stage. Relative abundances of the AM fungi found in three barley genotypes at GS14 and at GS90

**Fig. S8** Non-metric multidimensional scalingplot on the interaction between genotype (G) and AMF inoculation on the AMF community structure of barley. Principal coordinate analysis biplot on the effect of interaction between G and Inoc on plant functional parameters

| **Table S1** Characteristic of the genetic material of barley used in the study | | | | | | | |
| --- | --- | --- | --- | --- | --- | --- | --- |
| Genotype | Type of grain | Height of vegetation | Kernel | Growth habit | Harvesting time | Origin | Main destination |
| Atlante | Covered | Medium | Six-row | Intermediate | Early | Italy | Feed |
| Atomo | Covered | Medium | Two-row | Winter | Early | Italy | Feed |
| Concerto | Covered | Medium | Two-row | Spring | Mid-late maturity | UK | Malting |
| Mean height of vegetation: 82 ± 2.1 cm (Calvi 2022; Tini et al. 2022; Cattivelli et al. 2011) | | | | | | | |

| **Table S2** Physical and chemical parameters of soil of the field sites located in Santa Luce, Pisa (Italy). The field experiment was conducted in 2020 and 2021 growing seasons | | | | | | | | | | | | |
| --- | --- | --- | --- | --- | --- | --- | --- | --- | --- | --- | --- | --- |
| Year | Texture | Clay | Silty | Sand | pH | Totale N | C/N | Soil organic carbon | Available P | Available Fe | Available Zn | CEC |
|  | g kg-1 | g kg-1 | g kg-1 | H2O | mg kg-1 |  | g kg-1 | mg kg-1 | mg kg-1 | mg kg-1 | meq 100 g-1 |
| 2020 | clay loam | 314.9 a ± 2.9 | 247.8 a ± 4.8 | 437.0 b ± 6.3 | 8.0 ± 0.0 | 0.8 a ± 0.0 | 8.8 ± 0.3 | 12.5 a ± 0.0 | 35.0 ± 2.2 | 19.4 ± 0.0 | 0.4 ± 0.1 | 21.9 ± 0.0 |
| 2021 | silty clay loam | 345.0 b ± 2.3 | 594.0 b ± 2.8 | 61.0 a ± 1.9 | 8.0 ±0.0 | 1.6 b ± 0.0 | 7.9 ± 0.2 | 21.5 b ± 0.0 | 57.0 ± 10.0 | 13.5 ± 0.0 | 1.5 ± 0.0 | 20.7 ± 0.0 |
| Texture according to USDA classification (Staff 1993); CEC: cation exchange capacity; values are mean of five soil replicates (mean ± standard error); T-test was applied to evaluate the significance of the differences between years for soil parameters | | | | | | | | | | | | |

| **Table S3** *P*-values of three-way ANOVAs on the effect of year of cultivation (Y), barley genotype (G), and arbuscular mycorrhizal fungal (AMF) inoculation (Inoc) and their interactions on: AMF root colonization (Col), percentage of root length containing arbuscules (Arb), percentage of root length containing vesicles (Ves) at physiological maturity (GS90; Zadoks et al. 1974); grain yield and Zn, Cu, Mn, K, Ca, Mg, Fe, N, P concentration in grain. In bold statistically significant *P* values according to the post-hoc Tukey-B test | | | | | | | | | | | | | | | | |
| --- | --- | --- | --- | --- | --- | --- | --- | --- | --- | --- | --- | --- | --- | --- | --- | --- |
| Factor |  | Col | Arb | Ves |  | Grain yield |  | Zn | Cu | Mn | K | Ca | Mg | Fe | N | P |
| Y |  | **<0.001** | **<0.001** | **<0.001** |  | 0.069 |  | **<0.001** | **<0.001** | **<0.001** | **<0.001** | **<0.001** | <0.652 | **<0.001** | **<0.001** | <0.072 |
| G |  | <0.562 | **<0.002** | <0.377 |  | **0.014** |  | **<0.001** | **<0.001** | **<0.001** | **<0.001** | **<0.001** | **<0.001** | **<0.001** | **<0.001** | **<0.002** |
| Inoc |  | **<0.001** | **<0.014** | <0.263 |  | **<0.001** |  | **<0.001** | <0.955 | **<0.023** | **<0.001** | **<0.001** | **<0.001** | **<0.001** | **<0.001** | **<0.001** |
| Y x G |  | <0.124 | **<0.019** | <0.193 |  | **0.012** |  | **<0.001** | **<0.001** | **<0.001** | **<0.001** | **<0.007** | **<0.001** | **<0.001** | **<0.001** | <0.073 |
| Y x Inoc |  | **<0.003** | <0.946 | <0.435 |  | **0.027** |  | <0.932 | <0.066 | **<0.005** | **<0.003** | <0.398 | **<0.002** | **<0.001** | <0.686 | **<0.001** |
| G x Inoc |  | <0.098 | <0.078 | <0.237 |  | **0.023** |  | **<0.001** | **<0.002** | <0.538 | **<0.001** | **<0.001** | **<0.005** | **<0.001** | **<0.001** | <0.712 |
| Y x G x Inoc |  | **<0.038** | **<0.007** | <0.576 |  | **<0.001** |  | <0.283 | <0.131 | **<0.022** | <0.169 | <0.851 | **<0.039** | **<0.001** | **<0.007** | <0.459 |
| Y: year of cultivation, 2020 and 2021; G: Atlante, Atomo, Concerto (Table S1); Inoc: inoculum consisting of 14 AMF species originating from a local agricultural site; three replicate plots per treatment | | | | | | | | | | | | | | | | |

| **Table S4** Result of permutational analysis of variance (PERMANOVA) and variation partitioning of the effect of year of cultivation (Y), barley genotype (G), arbuscular mycorrhizal fungal (AMF) inoculation (Inoc) and their interactions on the plant and AMF parameters. Measures on the AM fungi were performed at GS90 (physiological maturity) (Zadoks et al. 1974). Results of the distance-based test for homogeneity of multivariate dispersions (PERMDISP) to check the dispersion among groups (β-diversity) | | | | | |
| --- | --- | --- | --- | --- | --- |
| Factor | df | Pseudo-*F* | *P*(perm) | Variance  explained | |
| Y | 1 | 162.3 | **0.001** | | **64.48** |
| G | 2 | 12.99 | **0.001** | | **7.19** |
| Inoc | 1 | 16.88 | **0.001** | | **6.35** |
| Y x G | 2 | 4.15 | **0.011** | | **3.78** |
| Y x Inoc | 1 | 3.02 | 0.060 | | 1.61 |
| G x Inoc | 2 | 2.88 | **0.039** | | **2.26** |
| Y x G x Inoc | 2 | 3.98 | **0.010** | | **7.14** |
| PERMDISP |  |  |  | |  |
| Y |  |  | 0.759 | |  |
| G |  |  | **0.045** | |  |
| Inoc |  |  | 0.175 | |  |
| PERMANOVA was performed following a permutation method based on an unrestricted permutation of raw data (Monte Carlo test based on 999 permutations) with Y, G and Inoc used as fixed factor factors and three replicate plots per treatment; Y: year of cultivation, 2020 and 2021; G: Atlante, Atomo, Concerto (Table S1); Inoc: inoculum consisting of 14 AMF species originating from a local agricultural site; in bold statistically significant values (*P* ≤ 0.05) and the corresponding explained variance; PERMDISP based on 999 permutations | | | | | |

| **Table S5** |  |  |
| --- | --- | --- |
| Results of permutational multivariate analysis of variance (PERMANOVA) pairwise comparisons of the significant effect of year of cultivation (Y), barley genotype (G), and arbuscular mycorrhizal fungal (AMF) inoculation (Inoc) on plant and AMF parameters | | |
| Pairs (Y & Genotype & Inoc) |  |  |
| 20 +M: | Pseudo-*F* | *P*(MC) |
| Atlante *vs* Atomo | 2.53 | **0.022** |
| Atlante *vs* Concerto | 1.69 | 0.110 |
| Atomo *vs* Concerto | 3.55 | **0.006** |
| 21 +M: |  |  |
| Atlante *vs* Atomo | 1.21 | 0.280 |
| Atlante *vs* Concerto | 3.83 | **0.005** |
| Atomo *vs* Concerto | 3.21 | **0.006** |
| 20 -M: |  |  |
| Atlante *vs* Atomo | 2.29 | **0.026** |
| Atlante *vs* Concerto | 1.56 | 0.158 |
| Atomo *vs* Concerto | .62 | **0.015** |
| 21 -M: |  |  |
| Atlante *vs* Atomo | 1.81 | 0.096 |
| Atlante *vs* Concerto | 3.51 | **0.014** |
| Atomo *vs* Concerto | 2.52 | **0.024** |
| 20: |  |  |
| Atlante +M *vs*-M | 0.89 | 0.465 |
| 21: |  |  |
| Atlante +M *vs*-M | 2.83 | **0.015** |
| 20: |  |  |
| Atomo +M *vs*-M | 4.40 | **0.002** |
| 21: |  |  |
| Atomo +M *vs*-M | 0.97 | 0.407 |
| 20: |  |  |
| Concerto +M *vs*-M | 2.03 | **0.039** |
| 21: |  |  |
| Concerto +M *vs*-M | 5.19 | **0.001** |
| Atlante + M: |  |  |
| 2020 *vs* 2021 | 4.25 | **0.003** |
| Atlante - M: |  |  |
| 2020 *vs* 2021 | 5.22 | **0.004** |
| Atomo + M: |  |  |
| 2020 *vs* 2021 | 5.29 | **0.003** |
| Atomo - M: |  |  |
| 2020 *vs* 2021 | 5.19 | **0.003** |
| Concerto + M: |  |  |
| 2020 *vs* 2021 | 7.50 | **0.001** |
| Concerto - M: |  |  |
| 2020 *vs* 2021 | 7.78 | **0.001** |
| Y: 2020 and 2021; G: Atlante, Atomo and Concerto (Table S1); Inoc: inoculum consisting of 14 AMF species originating from a local agricultural site; *P-*values based on Monte-Carlo permutational test with 999 permutations | | |

| **Table S6** Representative sequences of arbuscular mycorrhizal fungi (AMF) found in the roots of three barley varieties inoculated and not-inoculated with a local AMF consortium. The representative sequences were obtained from two plant growth stages: four leaves unfolded stage (GS14; Zadoks et al. 1974) and physiological maturity (GS90). Accession number of the retrieved AM fungal representative sequences, with the corresponding virtual taxon (VTX) (following the BLAST against the Maar  j*AM* database; Öpik et al. 2010), AM fungal family, taxon and the accession number of the representative sequence of the VTX | | | | | |
| --- | --- | --- | --- | --- | --- |
| Representative sequence (RS) | Accession number | VTX | Family | Taxon | Representative sequence in Maarj*AM* database |
| OTU-COM1-3.26189 | PP341550 | VTX00054 | Diversisporaceae | *Diversispora* sp. | AJ315524 |
| OTU-ATLM1-2.1702 | PP341534 | VTX00356 | Diversisporaceae | Diversispora sp. | HM215646 |
| OTU-ATLN1-3.6992 | PP341546 | VTX00052 | Gigasporaceae | *Gigaspora* sp./ *Scutellospora* sp. | AJ496115 |
| OTU-ATLM1-3.1800 | PP341547 | VTX00357 | Entrophosporaceae | *Entrophospora* sp. | HE576881 |
| OTU-ATLM1-2.880 | PP341530 | VTX00193 | Entrophosporaceae | *E. lamellosa/ Entrophospora* sp. | AJ276087 |
| OTU-ATON1-2.19727 | PP341543 | VTX00057 | Entrophosporaceae | *Entrophospora* sp. | DQ164831 |
| OTU-ATLM1-1.3 | PP341532 | VTX00225 | Entrophosporaceae | *Entrophospora* sp. | EF041080 |
| OTU-ATLM2-3.5023 | PP341548 | VTX00056 | Entrophosporaceae | *Entrophospora* sp. | AY916419 |
| OTU-ATLM1-2.1755 | PP341552 | VTX00418 | Glomeraceae | *Glomus* sp. | FN869759 |
| OTU-ATLN2-1.8135 | PP341549 | VTX00419 | Glomeraceae | *Glomus* sp. | EU340305 |
| OTU-ATLM2-1.3240 | PP341544 | VTX00098 | Glomeraceae | *Glomus* sp. | AB325992 |
| OTU-ATLM1-1.276 | PP341531 | VTX00143 | Glomeraceae | *Glomus* sp. | AM849290 |
| OTU-ATLN2-1.8051 | PP341542 | VTX00155 | Glomeraceae | *Glomus* sp. | DQ164825 |
| OTU-ATLM1-1.177 | PP341536 | VTX00342 | Glomeraceae | *Glomus* sp. | FN429114 |
| OTU-ATLN2-3.10448 | PP341554 | VTX00214 | Glomeraceae | *Glomus* sp. | AF074370 |
| OTU-CON1-3.32291 | PP341553 | VTX00078 | Glomeraceae | *Glomus* sp. | AY129614 |
| OTU-COM1-3.26229 | PP341545 | VTX00103 | Glomeraceae | *Glomus* sp. | EU350053 |
| OTU-ATLN2-3.11372 | PP341541 | VTX00392 | Glomeraceae | *Glomus* sp. | HM215654 |
| OTU-ATOM1-1.11482 | PP341537 | VTX00065 | Glomeraceae | *F. caledonium* sp./ *Funneliformis* sp. | Y17635 |
| OTU-ATLM1-1.12 | PP341539 | VTX00409 | Glomeraceae | *Glomus* sp./ *Septoglomus* sp. | HE615074 |
| OTU-ATLM1-1.58 | PP341540 | VTX00365 | Glomeraceae | *Glomus* sp./ *Septoglomus* sp. | HM215924 |
| OTU-ATLM1-1.57 | PP341551 | VTX00064 | Glomeraceae | *Glomus* sp./ *Septoglomus* sp. | AM849308 |
| OTU-ATLM2-2.3405 | PP341538 | VTX00063 | Glomeraceae | *S. viscosum/ Septoglomus* sp. | AJ505812 |
| OTU-ATLN2-1.8113 | PP341535 | VTX00113 | Glomeraceae | *Glomus* sp./ *Rhizophagus* sp. | AJ418876 |
| OTU-ATLM1-1.5 | PP341533 | VTX00363 | Glomeraceae | *Glomus* sp./ *Rhizophagus*sp. | FR821540 |
| OTU-ATLM1-1.70 | PP341529 | VTX00105 | Glomeraceae | *R. intraradices* sp./ *Rhizophagus* sp. | AJ505617 |
| Unique code identifier e.g. OTU COM1-3.26189 (OTU: operational taxonomic unit; CO: Concerto barley genotype; M: inoculated with AMF consortium; 1: GS14; 3: replicate plot; 26189: read number). Barley genotypes: Atlante, ATL; Atomo, ATO; Concerto, CO. Inoculation treatments: N, mock inoculated, control; M, inoculated with 14 AMF species originating from a local agricultural site. 1st taxon assigned following to the BLAST against the Maarj*AM* database; 2nd taxon: refined using the Neighbor-Joining tree built with the newly generated RS and the most similar sequences obtained from the BLAST in the National Center for Biotechnology Information (NCBI) | | | | | |

| **Table S7** *P*-values of three-way ANOVAs on the effect of barley genotype (G), arbuscular mycorrhizal fungal (AMF) inoculation (Inoc), growth stage (GS) and their interactions on the richness, Shannon index (*H*') and Simpson index (λ) of the arbuscular mycorrhizal fungi found within the roots of barley | | | |
| --- | --- | --- | --- |
| Factor | Richness | *H*' | **λ** |
| G | **<0.001** | **0.003** | 0.146 |
| Inoc | 0.149 | 0.062 | 0.037 |
| GS | **0.013** | 0.332 | 0.327 |
| G x Inoc | **0.027** | 0.359 | 0.918 |
| G x GS | 0.120 | 0.400 | 0.373 |
| Inoc x GS | 0.307 | **0.001** | **<0.001** |
| G x Inoc x GS | **0.001** | **<0.001** | **<0.001** |
| G, Inoc and GS used as fixed factor and three replicate plots per treatment; G: Atlante, Atomo and Concerto (Table S1); Inoc: inoculum consisting of 14 AMF species originating from a local agricultural site; GS: four leaves unfolded stage (GS14; Zadoks et al. 1974) and physiological maturity (GS90); in bold statistically significant values (*P* ≤ 0.05) | | | |

| **Table S8**Means and standard errors of three-way ANOVAs on the effect of barley genotype (G), arbuscular mycorrhizal fungal (AMF) inoculation (Inoc), growth stage (GS), and their interactions on richness, Shannon index (*H*') and Simpson index (λ) of arbuscular mycorrhizal fungi within the roots of barley | | | | |
| --- | --- | --- | --- | --- |
|  | Richness | *H*' | **λ** |
| GS14 |  |  |  |
| Atlante -M | 7.0 ± 1.0 a | 1.1 ± 0.2 ab | 0.5 ± 0.1 ab |
| Atlante +M | 16.3 ± 1.9 d | 1.9 ± 0.1 d | 0.8 ± 0.0 c |
| Atomo -M | 6.7 ± 1.3 a | 0.9 ± 0.2 a | 0.4 ± 0.1 a |
| Atomo +M | 5.3 ± 0.3 a | 1.4 ± 0.0 abc | 0.7 ± 0.0 bc |
| Concerto -M | 9.3 ± 2.3 abc | 1.3 ± 0.2 abc | 0.6 ± 0.1 ab |
| Concerto +M | 7.0 ± 2.0 a | 1.1 ± 0.0 ab | 0.6 ± 0.0 ab |
| GS90 |  |  |  |
| Atlante -M | 13.7 ± 1.3 cd | 1.6 ± 0.1 cd | 0.7 ± 0.0 bc |
| Atlante +M | 12.7 ± 0.7 bcd | 1.3 ± 0.0 abc | 0.6 ± 0.0 ab |
| Atomo -M | 10.0 ± 1.0 abc | 1.5 ± 0.1 bcd | 0.7 ± 0.0 bc |
| Atomo +M | 10.3 ± 0.3 abc | 1.1 ± 0.1 ab | 0.6 ± 0.0 ab |
| Concerto -M | 7.7 ± 0.9 ab | 1.1 ± 0.1 ab | 0.6 ± 0.0 ab |
| Concerto +M | 9.3 ± 0.3 abc | 1.4 ± 0.1 bc | 0.7 ± 0.0 bc |
| G, Inoc and GS used as fixed factor and three replicate plots per treatment; G: Atlante, Atomo and Concerto (Table S1); Inoc: inoculum consisting of 14 AMF species originating from a local agricultural site; GS: four leaves unfolded stage (GS14; Zadoks et al. 1974) and physiological maturity (GS90) | | | |

| **Table S9** Results of permutational analysis of variance (PERMANOVA) and variation partitioning of the effect of barley genotype (G), arbuscular mycorrhizal fungal (AMF) inoculation (Inoc), and growth stage (GS), and their interactions on the AMF community structure within the roots of barley sampled in 2021. Results of the distance-based test for homogeneity of multivariate dispersions (PERMDISP) to check the dispersion among groups (β-diversity) | | | | |
| --- | --- | --- | --- | --- |
| Factor | df | Pseudo-*F* | *P* (MC) | Variance explained |
| G | 2 | 3.68 | **0.001** | **7.89** |
| Inoc | 1 | 1.77 | 0.121 | 1.51 |
| GS | 1 | 9.4 | **0.001** | **16.47** |
| G x Inoc | 2 | 2.42 | **0.012** | **8.35** |
| G x GS | 2 | 1.29 | 0.21 | 1.69 |
| Inoc x GS | 1 | 2.35 | **0.04** | **5.28** |
| G x Inoc x GS | 2 | 3.00 | **0.003** | **23.51** |
| *PERMDISP* |  |  |  |  |
| G |  |  | 0.554 |  |
| Inoc |  |  | 0.169 |  |
| GS |  |  | **0.001** |  |
| PERMANOVA was performed following a permutation method based on an unrestricted permutation of raw data (Monte Carlo test based on 999 permutations) with G, Inoc, and GS used as fixed factor factors and three replicate plots per treatment; G: Atlante, Atomo, and Concerto (Table S1); Inoc: inoculum consisting of 14 AMF species originating from a local agricultural site; GS: four leaves unfolded stage (GS14; Zadoks et al. 1974) and physiological maturity (GS90); PERMDISP based on 999 permutations; in bold statistically significant values (*P* ≤ 0.05) and the corresponding explained variance | | | | |

| **Table S10** Results of permutational multivariate analysis of variance (PERMANOVA) pairwise comparisons of the effect of barley genotype (G), arbuscular mycorrhizal fungal (AMF) inoculation (Inoc), and growth stage (GS) on the AMF community structure found within the roots sampled in 2021 | | |
| --- | --- | --- |
| Pairs (G & Inoc & GS) | |  |
| GS14: +M | Pseudo-*F* | *P*(MC) |
| Atlante *vs* Atomo |  | **0.024** |
| Atlante *vs* Concerto |  | **0.023** |
| Atomo *vs* Concerto |  | 0.541 |
| GS90: +M |  |  |
| Atlante *vs* Atomo |  | 0.079 |
| Atlante *vs* Concerto |  | 0.157 |
| Atomo *vs* Concerto |  | 0.304 |
| GS14: -M |  |  |
| Atlante *vs* Atomo |  | 0.524 |
| Atlante *vs* Concerto |  | 0.319 |
| Atomo *vs* Concerto |  | 0.207 |
| GS90: -M |  |  |
| Atlante *vs* Atomo |  | 0.103 |
| Atlante *vs* Concerto |  | 0.110 |
| Atomo *vs* Concerto |  | 0.118 |
| GS14: |  |  |
| Atlante +M *vs* -M |  | **0.046** |
| GS90: |  |  |
| Atlante +M *vs* -M |  | **0.024** |
| GS14: |  |  |
| Atomo +M *vs* -M |  | 0.41 |
| GS90: |  |  |
| Atomo +M *vs* -M |  | **0.036** |
| GS14: |  |  |
| Concerto +M *vs* -M |  | 0.270 |
| GS90: |  |  |
| Concerto +M *vs* -M |  | 0.275 |
| Atlante +M: | |  |
| GS14 *vs* GS90 |  | **0.022** |
| Atlante -M: | |  |
| GS14 *vs* GS90 |  | 0.054 |
| Atomo +M: | |  |
| GS14 *vs* GS90 |  | 0.059 |
| Atomo -M: | |  |
| GS14 *vs* GS90 |  | **0.047** |
| Concerto +M: | |  |
| GS14 *vs* GS90 |  | 0.084 |
| Concerto -M: | |  |
| GS14 *vs* GS90 |  | 0.270 |
| G: Atlante, Atomo and Concerto (TableS1); Inoc: inoculum consisting of 14 AMF species originating from a local agricultural site; GS: four leaves unfolded stage (GS14; Zadoks et al. 1974) and physiological maturity (GS90); *P-*values based on Monte-Carlo permutational test with 999 permutations | | |

**Supplementary Figures**


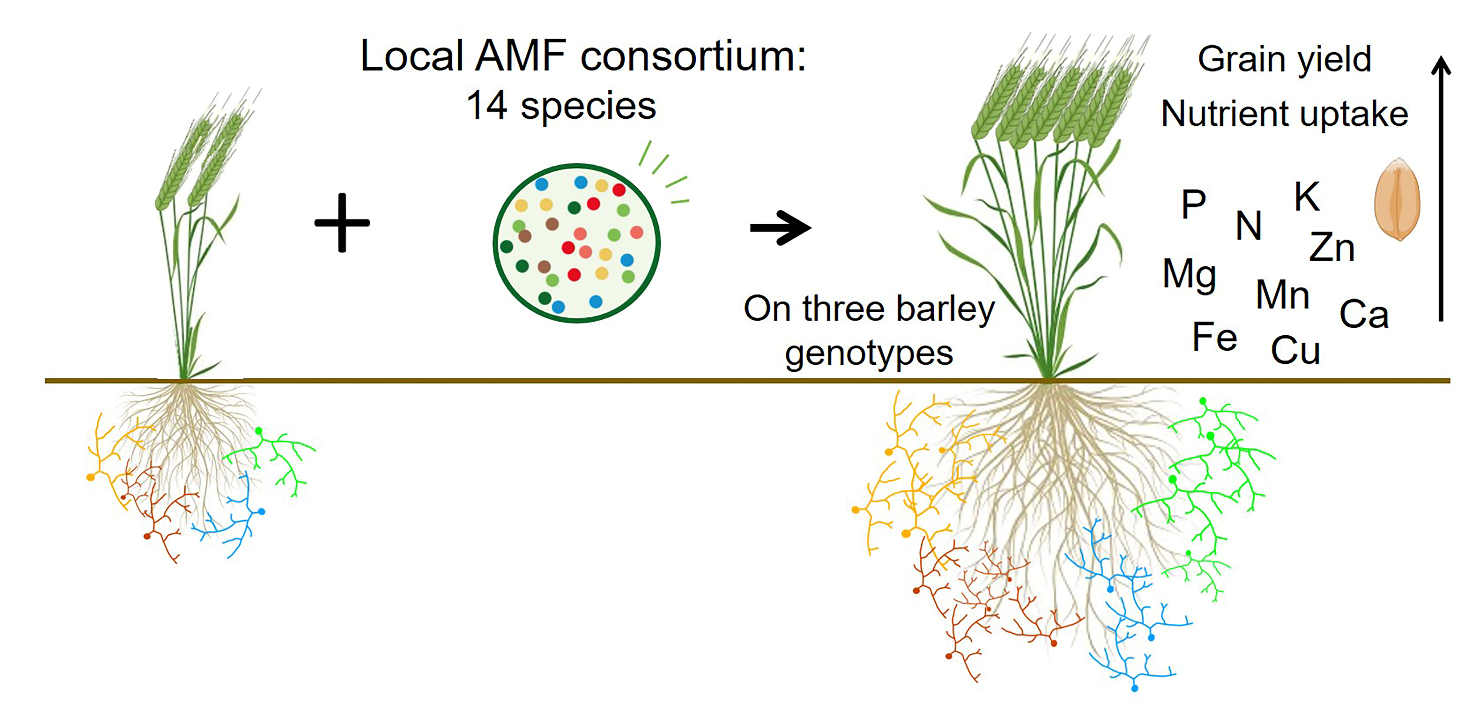


**Fig. S1** Graphical scheme of the study aiming to elucidate the effect of field inoculation of barley with an indigenous arbuscular mycorrhizal fungal (AMF) consortium on yield and nutrient concentration in grains. We hypothesized that AMF inoculation will not modify root AMF community composition, whereas it will modify the AMF root abundance and community structure with subsequent multiple beneficial effects for the host. Field inoculation was carried out in two years of cultivations (2020 and 2021). Three barley genotypes were inoculated with the AMF consortium: Atlante, Atomo, and Concerto (Table S1). The AMF inoculation treatments were: inoculated with 14 AMF species originating from a local agricultural site, and mock-inoculum as control


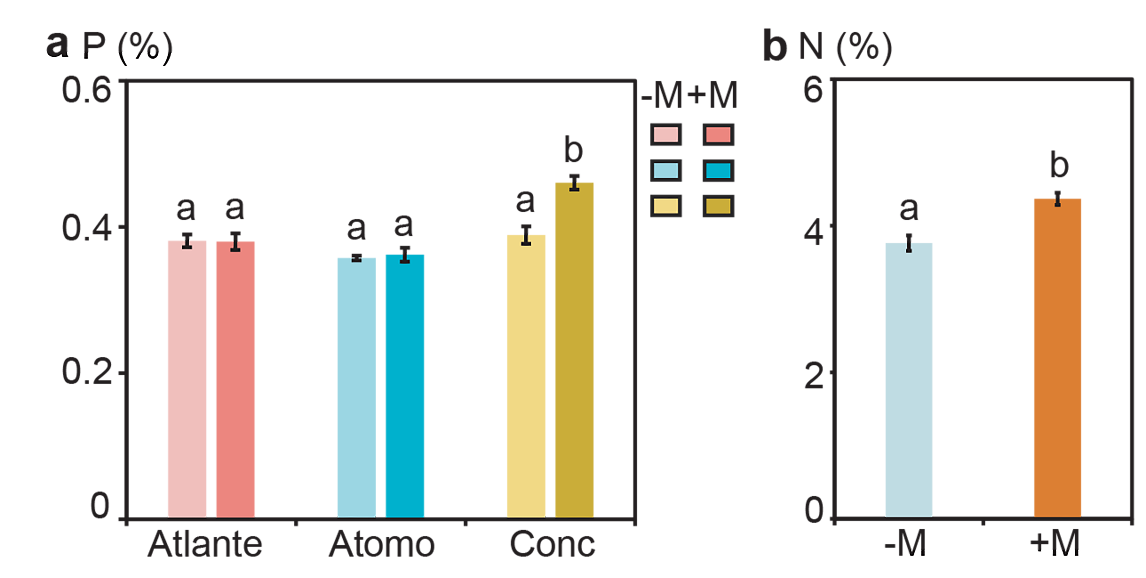


**Fig. S2** Effect of the interaction between barley genotype (G) and AMF inoculation (Inoc) on P concentration in shoot at the four leaves unfolded stage (GS14) (a). Effect of the Inoc on N concentration in shoot at GS14 (b). The three barley genotypes: Atlante, Atomo, and Concerto (Table S1). The AMF inoculation treatments were: inoculated with 14 AMF species originating from a local agricultural site (+M), and mock-inoculum as control (-M). Values are means ± standard errors

**
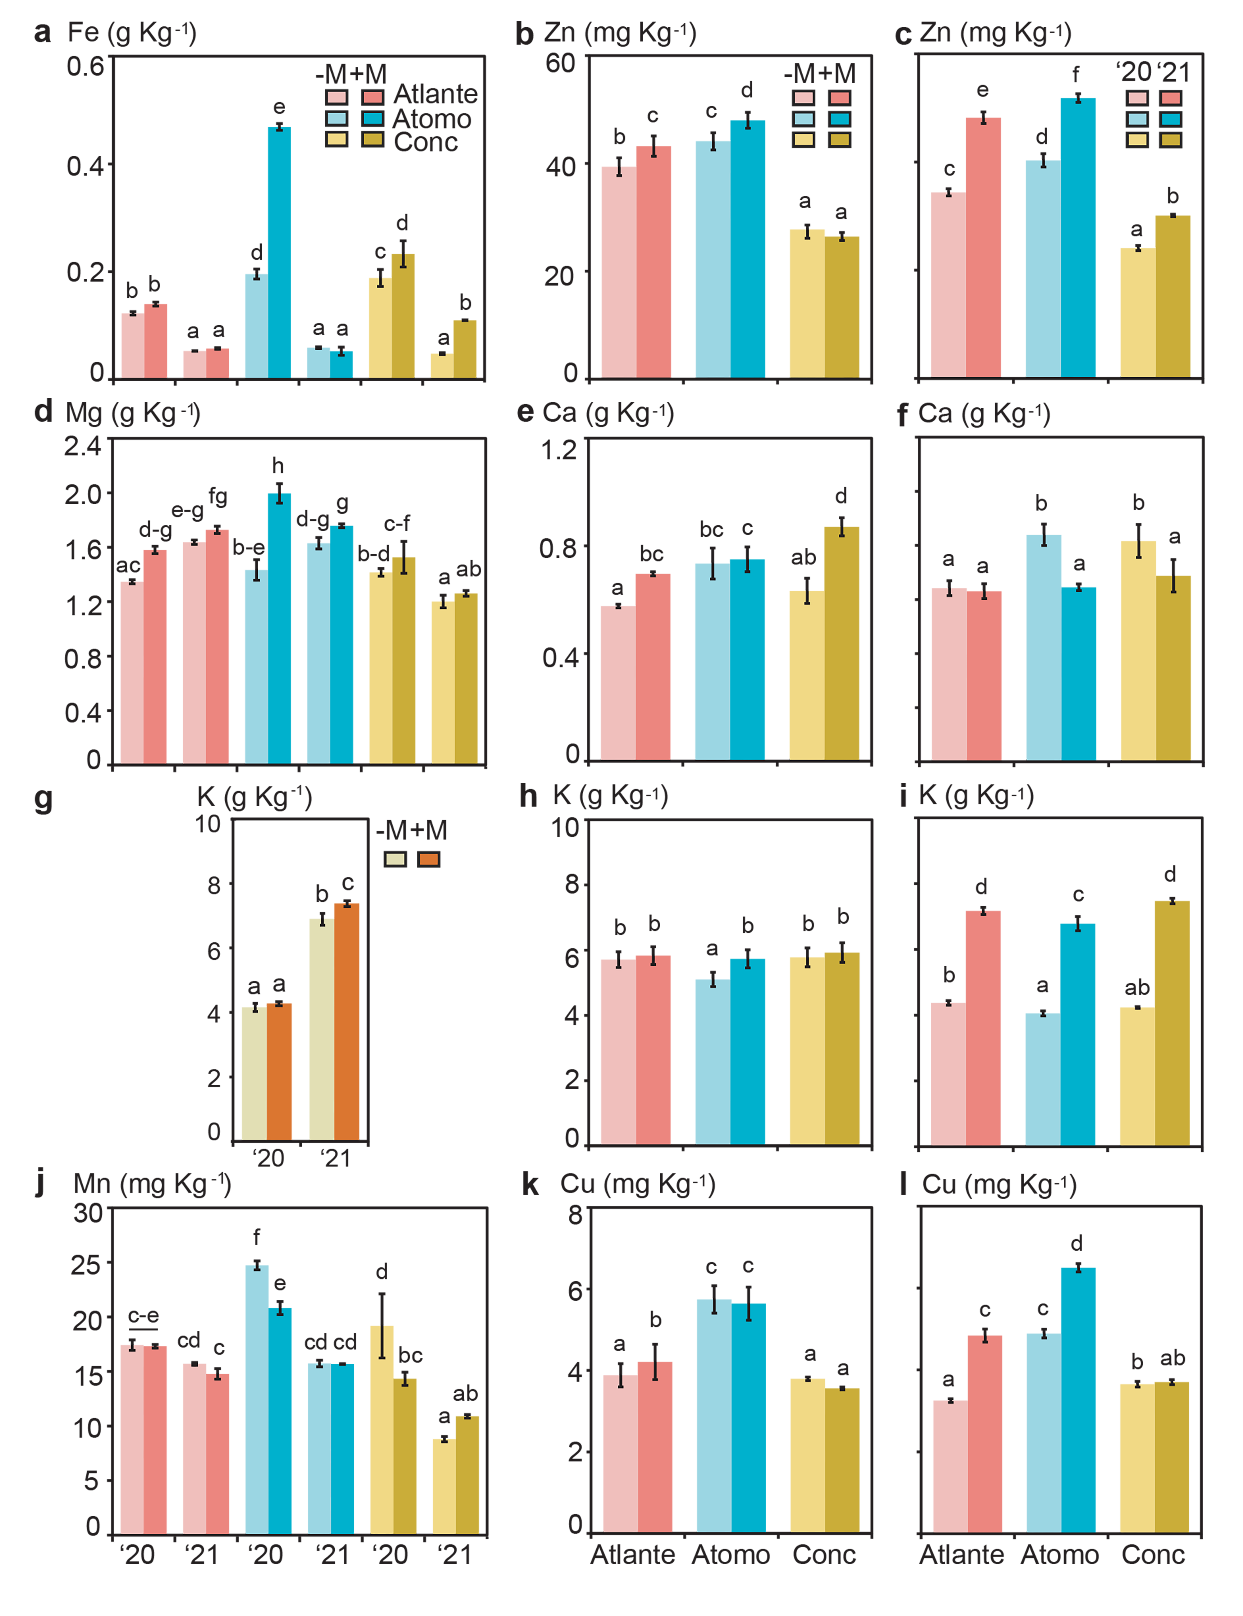
**

**Fig. S3** Effect of the interaction among year of cultivation, barley genotype, and arbuscular mycorrhizal fungal (AMF) inoculation on grain nutrient concentration at the physiological maturity (GS90; Zadoks et al. 1974) (Table S3). Effect of the interaction among year of cultivation (Y), barley genotype (G), and arbuscular mycorrhizal fungal (AMF) inoculation (Inoc) on: Fe (a), Mg (d), Mn (j). Effect of the interaction between G and Inoc on Zn (b), Ca (e), K (h), and Cu (k), and between Y and G on Zn (c), Ca (f), K (i), and Cu (l). Effect of the interaction between Y and Inoc on K (g). The years of cultivation were: 2020 (‘20) and 2021 (‘21). Three barley genotypes: Altante, Atomo, and Concerto (Table S1). The AMF inoculation treatments were: inoculated with 14 AMF species originating from a local agricultural site (+M) and mock-inoculum as control (-M). Different letters highlight statistically significant differences according to the Tukey-B-test


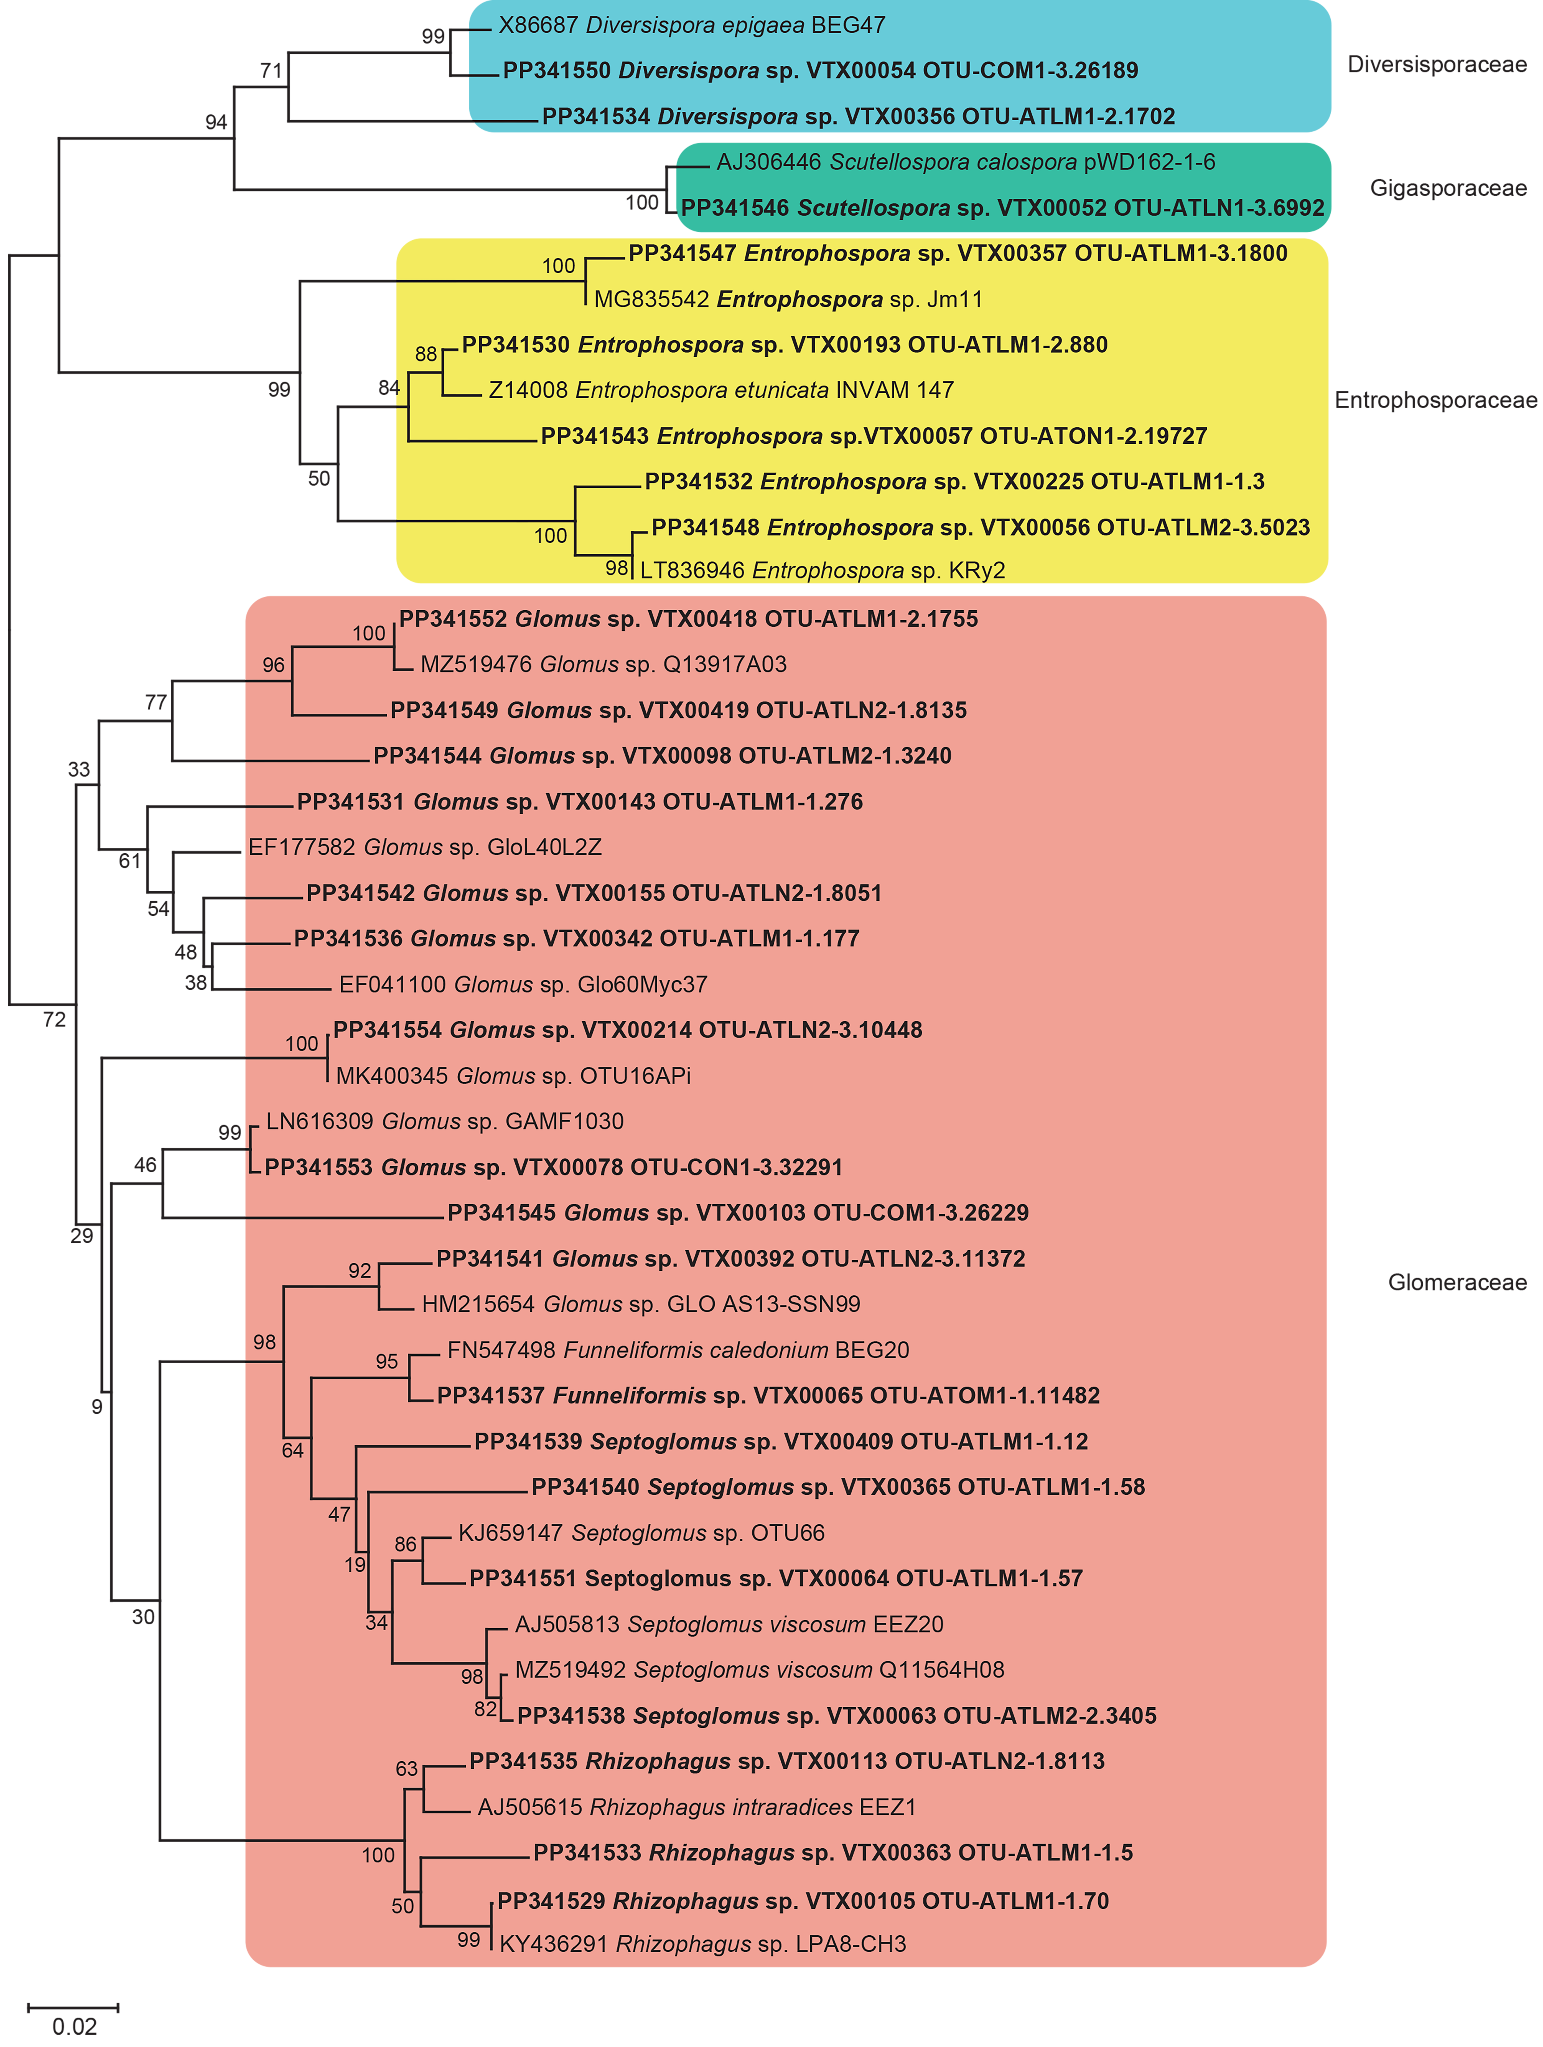


**Fig. S4** Neighbor-Joining (NJ) (Saitou and Nei 1987) tree of the representative sequences of arbuscular mycorrhizal fungi (AMF; Glomeromycota) (operational taxonomic units, OTUs) retrieved within the roots of three barley genotypes inoculated in 2021 by an indigenous consortium of AM fungi and mock-inoculated. Roots were sampled at two growth stages (four leaves unfolded stage, GS14 and physiological maturity GS90; Zadoks et al. 1974). The tree includes also the most similar AM fungal sequences from NCBI. The representative sequences were assigned to Virtual Taxa (VTX) by BLAST against the Maarj*AM* database (https://maarjam.ut.ee) (a total of 26 AM fungal VTX belonging to four families). The analysis involved 43 sequences (26 representative sequences and 17 NCBI sequences) and a total of 274 positions. The analysis was performed by 1000 bootstrap replicates (Felsenstein 1985) and the Kimura 2-parameter method (Kimura 1980). Bootstrap values are shown. Evolutionary analyses were conducted in MEGA11 (Tamura et al. 2021). The newly generated representative AM fungal sequences are in bold and the VTX code is reported together with the accession number and the ID code of the OTU (Table S6). All newly generated sequences were deposited in the NCBI Sequence Read (SRA) database as SUB14254691 (accession numbers from PP341529 to PP341554). The NJ tree is based on the sequences obtained from the amplification of the small subunit ribosomal RNA (SSU) fragments amplified using a nested PCR approach with two primer pairs (AML1/AML2 and WANDA-ill/AML2- ill) (Dumbrell et al. 2011; Lee et al. 2008)


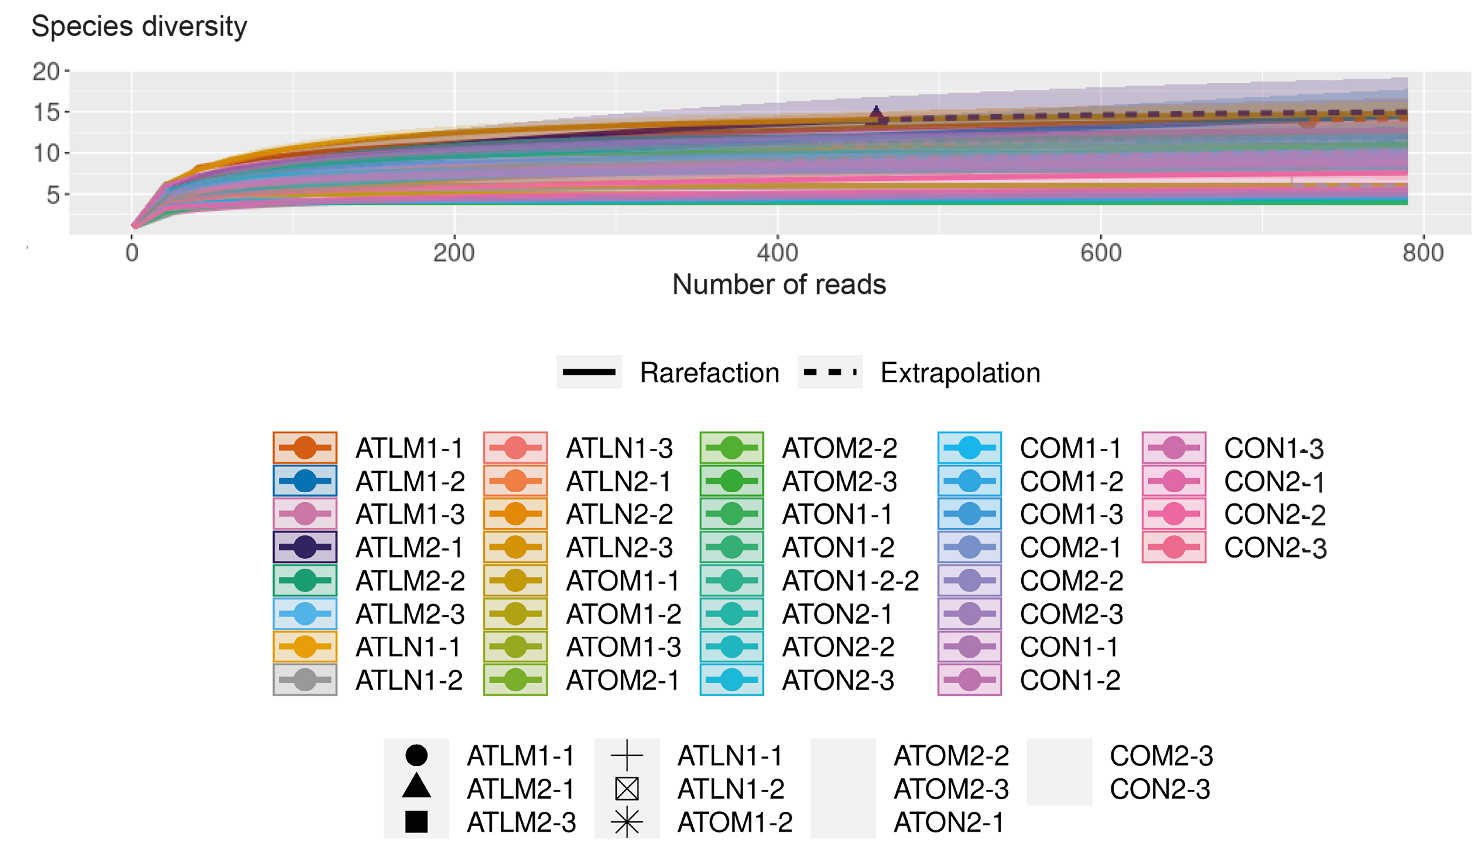


**Fig. S5** Rarefaction curves of arbuscular mycorrhizal fungi (AMF) at virtual taxon level found in the roots of three barley genotypes inoculated and not-inoculated with an indigenous AM fungal consortium at the four leaves unfolded stage (GS14) and at physiological maturity (GS90). Rarefaction curves confirmed that the MiSeq sequencing effort was sufficient for the analysis of the effect of barley genotype, AM fungal inoculation, growth stage, and their interactions on AM fungal communities. Unique code identifier e.g. ATLM1-1 (ATL: Atlante barley genotype; M: inoculated with AM fungal consortium; 1: GS14; 3: replicate plot). Barley genotypes: Atlante, ATL; Atomo, ATO; Concerto, CO. Inoculation treatment: N, mock-inoculated, control; M, inoculated with 14 AM fungal species originating from a local agricultural site. Rarefaction curves were calculated and generated using iNEXT (iNterpolation and EXTrapolation) (<https://chao.shinyapps.io/iNEXTOnline/>), plotting diversity estimates with respect to sample size (Chao et al. 2014; Chao et al. 2016)


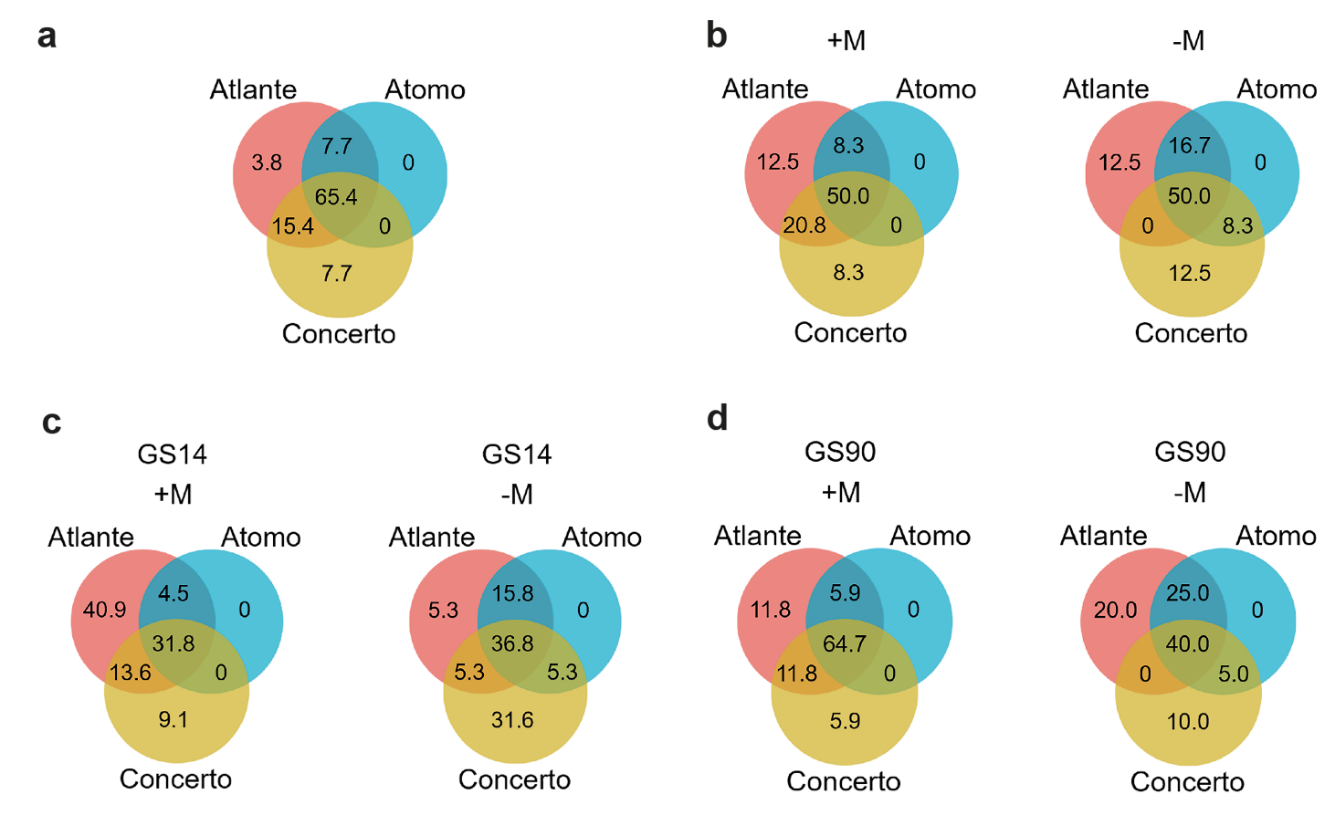


**Fig. S6** Venn diagrams (a) of the AM fungal virtual taxa (VTXs) uniquely retrieved in the roots and shared among the three barley genotypes, irrespective of AM fungal inoculation and plant growth stage (GS). Venn diagrams (b) of the VTXs uniquely retrieved in the roots and shared among the three barley genotypes in inoculated conditions and in the controls, irrespective of GS. Venn diagrams (c) of the VTXs uniquely retrieved in the roots and shared among the three barley genotypes in inoculated conditions (+M) and in the controls (-M), at the four leaves unfolded stage (GS14). Venn diagrams (d) of the VTXs uniquely retrieved in the roots and shared among the three barley genotypes in +M and in -M, at the physiological maturity (GS90). The relative abundances used in all the Venn diagrams are the means of each treatment for the 2021 year of cultivation. Information about VTX is reported in Table S6. Data are expressed as percentages


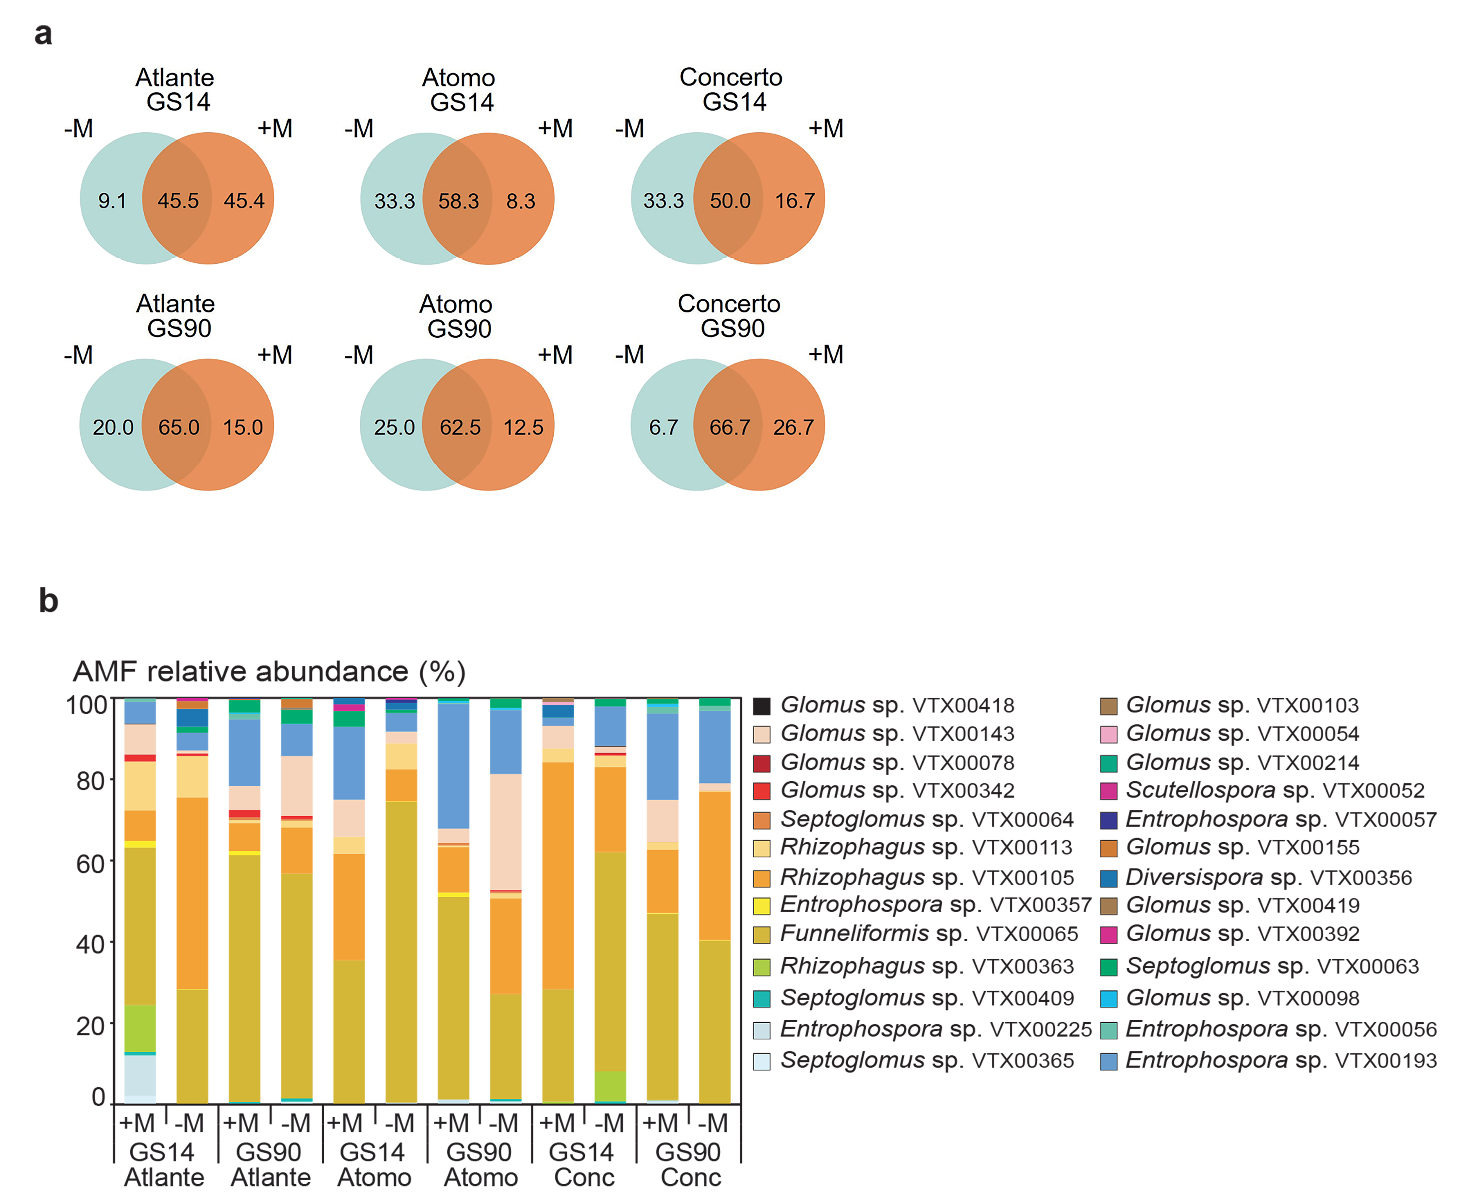


**Fig. S7** Venn diagrams (a) of the AM fungi (i.e., virtual taxa, VTX) uniquely retrieved and shared between GS14 and GS90 in each barley genotype inoculated and not inoculated (data are expressed as percentages). Bar chart of the relative abundances (b) of the AM fungal VTX found in the roots of three barley genotypes inoculated and not inoculated at the four leaves unfolded stage (GS14) and at physiological maturity (GS90). The relative abundances used in (a) and (b) are the means of each treatment for the 2021 year of cultivation. Information about VTX is reported in Table S6


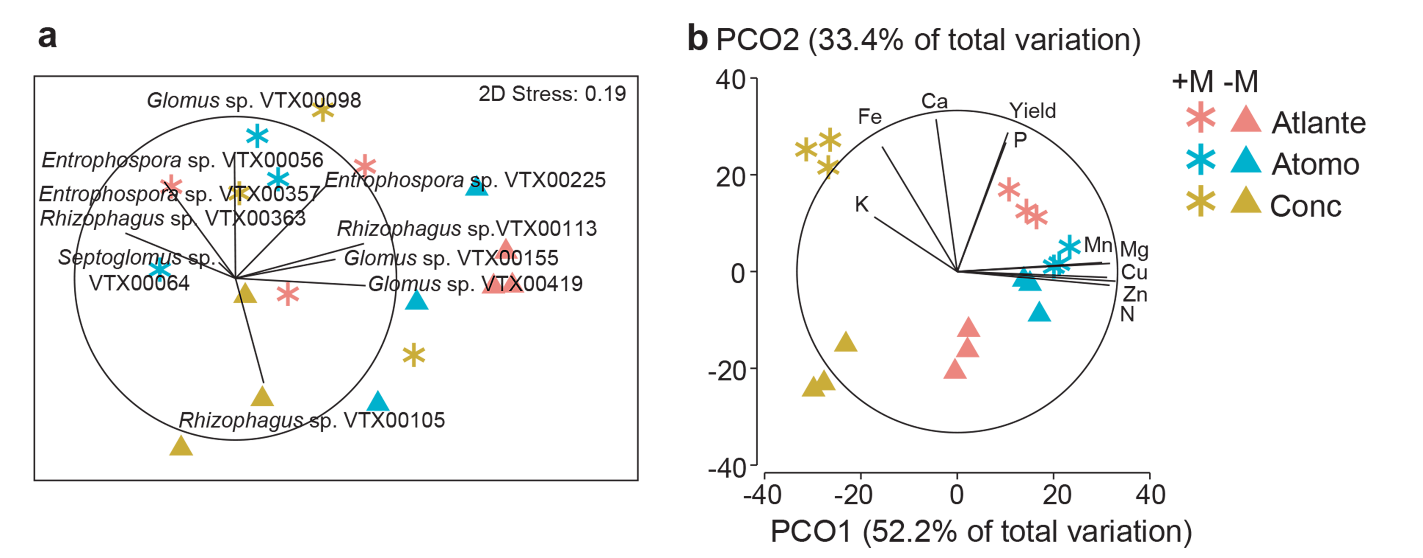


**Fig. S8** Two-dimensional non-metric multidimensional scaling (nMDS) plot (a) on the significant effect of the interaction between barley genotype (G) and arbuscular mycorrhizal fungal (AMF) inoculation (Inoc) on the AMF community structure in the roots of barley. In the plot, the overlay of vectors is reported and only the AMF taxa with a strong correlation (*r* > 0.6) are displayed. The data matrix is built using the abundances of the AMF virtual taxa (VTX) found at physiological maturity (GS90; Zadoks et al. 1974) in 2021 (n=18). Principal coordinate analysis (PCO) biplot (b) on the effect of G and Inoc on plant functional parameters (i.e., yield and nutrient concentrations in grains). The PCO is based on the Euclidian distance matrix calculated on the square root and standardized plant parameters measured at GS90 in 2021. The three barley genotypes were: Atlante, Atomo, and Concerto (Table S1). The AMF inoculation treatments were: inoculated with 14 AMF species originating from a local agricultural site (+M), and mock-inoculum as control (-M)

**References**

Al Mutairi AA, Cavagnaro TR, Khor SF, Neumann K, Burton RA, Watts-Williams SJ (2020) The effect of zinc fertilization and arbuscular mycorrhizal fungi on grain quality and yield of contrasting barley cultivars. Funct Plant Biol 47:122-133. https://doi.org/10.1071/FP19220

Alloway BJ (1995) Soil processes and the behaviour of metals. In: Heavy metals in soils. Blackie Academic & Professional. Glasgow, UK, pp. 11-35

Anderson MJ (2005) PERMANOVA: a FORTRAN computer program for permutational multivariate analysis of variance. Department of Statistics, University of Auckland, New Zealand

Anderson M, Braak CT (2003) Permutation tests for multi-factorial analysis of variance. J Stat Comput Sim 73:85-113. https://doi.org/10.1080/00949650215733

Blake L, Mercik S, Koerschens M, Goulding KWT, Stempen S, Weigel A, Poulton PR, Powlson DS (1999) Potassium content in soil, uptake in plants and the potassium balance in three European long-term field experiments. Plant Soil 216:1-14. https://doi.org/10.1023/A:1004730023746

Bremner JM, Mulvaney CS (1982) Nitrogen – total. In: Methods of Soil Analysis, Part 2, Chemical and Microbiological Properties Agronomy Monograph. American Society of Agronomy, Madison, pp. 595-624

Calvi A, Preiti G (2022) Preliminary characterization of the malting quality of malting barley and landraces of wheat and rye grown in a Mediterranean environment (southern Italy). Optimization of the malting process of Calabrian cereal landraces through response surface methodology. Dissertation, University of Reggio Calabria

Cardini A, Pellegrino E, Declerck S, Calonne‐Salmon M, Mazzolai B, Ercoli L (2021) Direct transfer of zinc between plants is channelled by common mycorrhizal network of arbuscular mycorrhizal fungi and evidenced by changes in expression of zinc transporter genes in fungus and plant. Environ Microbiol 23:5883-5900. https://doi.org/10.1111/1462-2920.15542

Cattivelli L, Faccini N, Gianinetti A, Bonciarelli U (2011) Guida alla scelta delle varietà di orzo per la zootecnia. L'informatore agrario 2011:38-46. https://www.researchgate.net. Accessed 23 april 2024

Chao A, Gotelli NJ, Hsieh TC, Sander EL, Ma KH, Colwell RK, Ellison AM (2014) Rarefaction and extrapolation with Hill numbers: a framework for sampling and estimation in species diversity studies. Ecol Monogr 84:45-67. https://doi.org/10.1890/13-0133.1

Chao A, Ma KH, Hsieh TC (2016) iNEXT (iNterpolation and EXTrapolation) Online: Software for Interpolation and Extrapolation of Species Diversity. Program and User's Guide published at http://chao.stat.nthu.edu.tw/wordpress/software_download/inext-online/

Dominguez-Nuñez JA, Benito B, Berrocal-Lobo M, Albanesi, A (2016) Mycorrhizal fungi: role in the solubilization of potassium. In: Potassium Solubilizing Microorganisms for Sustainable Agriculture. Springer, New Delhi, pp. 77-98. https://doi.org/10.1007/978-81-322-2776-2_6

Dumbrell AJ, Ashton PD, Aziz N, Feng G, Nelson M, Dytham C, Fitter AH, Helgason T (2011) Distinct seasonal assemblages of arbuscular mycorrhizal fungi revealed by massively parallel pyrosequencing. New Phytol 190:794-804. https://doi.org/10.1111/j.1469-8137.2010.03636.x

Fan MS, Zhao FJ, Fairweather-Tait SJ, Poulton PR, Dunham SJ, McGrath SP (2008) Evidence of decreasing mineral density in wheat grain over the last 160 years. J Trace Elem Med Biol 22:315-324. https://doi.org/10.1016/j.jtemb.2008.07.002

Felsenstein J (1985) Confidence limits on phylogenies: an approach using the bootstrap. Evolution 39:783-791. https://doi.org/10.1111/j.1558-5646.1985.tb00420.x

Gower JC (1966) Some distance properties of latent root and vector methods used in multivariate analysis. Biometrika 53:325-338. https://doi.org/10.1093/biomet/53.3-4.325

Gyuricza V, de Boulois HD, Declerck S (2010) Effect of potassium and phosphorus on the transport of radiocesium by arbuscular mycorrhizal fungi. J Environ Radioactiv 101:482-487. https://doi.org/10.1016/j.jenvrad.2008.04.002

Kimura M (1980) A simple method for estimating evolutionary rates of base substitutions through comparative studies of nucleotide sequences. J Mol Evol 16:111-120. https://doi.org/10.1007/BF01731581

Kothari SK, Marschner H, Romheld V (1991) Effect of a vesicular arbuscular mycorrhizal fungus and rhizosphere microorganisms on manganese reduction in the rhizosphere and manganese concentrations in maize (*Zea mays* L.). New Phytol 117:649e655. https://doi.org/10.1111/j.1469-8137.1991.tb00969.x

Kruskal JB (1964) Nonmetric multidimensional scaling: a numerical method. Psychometrika 29:115-129

Lee J, Lee S, Young JPW (2008) Improved PCR primers for the detection and identification of arbuscular mycorrhizal fungi. FEMS Microbiol Ecol 65:339-349. https://doi.org/10.1111/j.1574-6941.2008.00531.x

Lehmann A, Rillig MC (2015) Arbuscular mycorrhizal contribution to copper, manganese and iron nutrient concentrations in crops–a meta-analysis. Soil Biol Biochem 81:147-158. https://doi.org/10.1016/j.soilbio.2014.11.013

Lehmann A, Veresoglou SD, Leifheit EF, Rillig MC (2014) Arbuscular mycorrhizal influence on zinc nutrition in crop plants–a meta-analysis. Soil Biol Biochem 69:123-131. https://doi.org/10.1016/j.soilbio.2013.11.001

Liberato CG, Juan AVA, Barros AV, et al. 2020 Determination of macro and micronutrients in plants using the Agilent 4200 MP AES Agilent Technologies

Lindsay WL, Norvell W (1978) Development of a DTPA soil test for zinc, iron, manganese, and copper. Soil Sci Soc Am J 42:421-428. <https://doi.org/10.2136/sssaj1978.03615995004200030009x>

Masrahi AS, Alasmari A, Shahin MG, Qumsani AT, Oraby HF, Awad-Allah MM (2023) Role of arbuscular mycorrhizal fungi and phosphate solubilizing bacteria in improving yield, yield components, and nutrients uptake of barley under salinity soil. Agriculture 13:537. https://doi.org/10.3390/agriculture13030537

McLean EO (1982) Soil pH and lime requirement In: Methods of Soil Analysis, Part 2. Chemical and Microbiological Properties. American Society of Agronomy, Soil Science Society of America, Madison, pp. 199-224

Nelson DW, Sommers LE (1982) Total carbon, organic carbon and organic matter. In: Methods of Soil Analysis, Part 2, Chemical and Microbiological Properties Agronomy Monograph. American Society of Agronomy, Madison, pp. 539-579

Olsen SR, Sommers LE (1982) Phosphorus. In: Methods of Soil Analysis, Part 2, Chemical and Microbiological Properties Agronomy Monograph. American Society of Agronomy, Madison, pp. 403-430

Öpik M, Vanatoa A, Vanatoa E, Moora M, Davison J, Kalwij JM, Reier Ü, Zobel M, (2010) The online database Maarj*AM* reveals global and ecosystemic distribution patterns in arbuscular mycorrhizal fungi (Glomeromycota). New Phytol 188:223-241. https://doi.org/10.1111/j.1469-8137.2010.03334.x

Pellegrino E, Öpik M, Bonari E, Ercoli L (2015) Responses of wheat to arbuscular mycorrhizal fungi: a meta-analysis of field studies from 1975 to 2013. Soil Biol Biochem 84:210-217. https://doi.org/10.1016/j.soilbio.2015.02.020

Pellegrino E, Piazza G, Arduini I, Ercoli L (2020) Field inoculation of bread wheat with *Rhizophagus irregularis* under organic farming: variability in growth response and nutritional uptake of eleven old genotypes and a modern variety. Agronomy 10:333. https://doi.org/10.3390/agronomy10030333

Powell CL, Groters M, Metcalfe D (1980) Mycorrhizal inoculation of a barley crop in the field. New Zealand J Agric Res 23:107-109. https://doi.org/10.1080/00288233.1980.10417853

Saitou N, Nei M (1987) The neighbor-joining method: a new method for reconstructing phylogenetic trees. Mol Biol Evol 4:406-425.https://doi.org/10.1093/oxfordjournals.molbev.a040454

Staff SS (1993) Soil Survey Manual. USDA Handbook no. 18. US Government Printing Office, Washington

Tamura K, Stecher G, Kumar S (2021) MEGA11: molecular evolutionary genetics analysis version 11. Mol Biol Evol 38:3022-3027. https://doi.org/10.1093/molbev/msab120

Tini F, Covarelli L, Ricci G, Balducci E, Orfei M, Beccari G (2022) Management of *Pyrenophora teres* f*. teres*, the causal agent of net form net blotch of barley, in a two-year field experiment in central Italy. Pathogens 11:291. https://doi.org/10.3390/pathogens11030291

Xie K, Cakmak I, Wang S, Zhang F, Guo S (2021) Synergistic and antagonistic interactions between potassium and magnesium in higher plants. Crop J 9:249-256. https://doi.org/10.1016/j.cj.2020.10.005

Watts-Williams SJ, Cavagnaro TR (2018) Arbuscular mycorrhizal fungi increase grain zinc concentration and modify the expression of root ZIP transporter genes in a modern barley (Hordeum vulgare) cultivar. Plant Sci 274:163-170. https://doi.org/10.1016/j.plantsci.2018.05.015

Watts‐Williams SJ, Gilbert SE (2021) Arbuscular mycorrhizal fungi affect the concentration and distribution of nutrients in the grain differently in barley compared with wheat. Plants People Planet 3:567-577. https://doi.org/10.1002/ppp3.10090

Zadoks JC, Chang TT, Konzak CF (1974) A decimal code for the growth stages of cereals. Weed Res 14:415-42
